# Supplementary material
Source: bioRxiv or medRxiv preprint supplement (https://www.biorxiv.org/highwire/filestream/894/field_highwire_adjunct_files/0/003350-1.pdf)
Supplement: Supplementary file [file 003350-1.pdf]

Supplementary information for manuscript:

**Horizontal Transfers and Gene Losses in the phospholipid pathway of *Bartonella* reveal clues about early ecological niches**

Authors: Qiyun Zhu, Michael Kosoy, Kevin J. Olival, Katharina Dittmar

**Contents**

Figure S1 Core genome phylogeny of *Bartonella*

Figure S2 Standard phylogenetic analysis of *Bartonella*

Figure S3 Phylogeny of the Ugp system in *Bartonella*

Figure S4 Phylogeny of *Bartonella plsX* gene

Table S1 Additional genomic data assessed in this study

Table S2 Selection test results

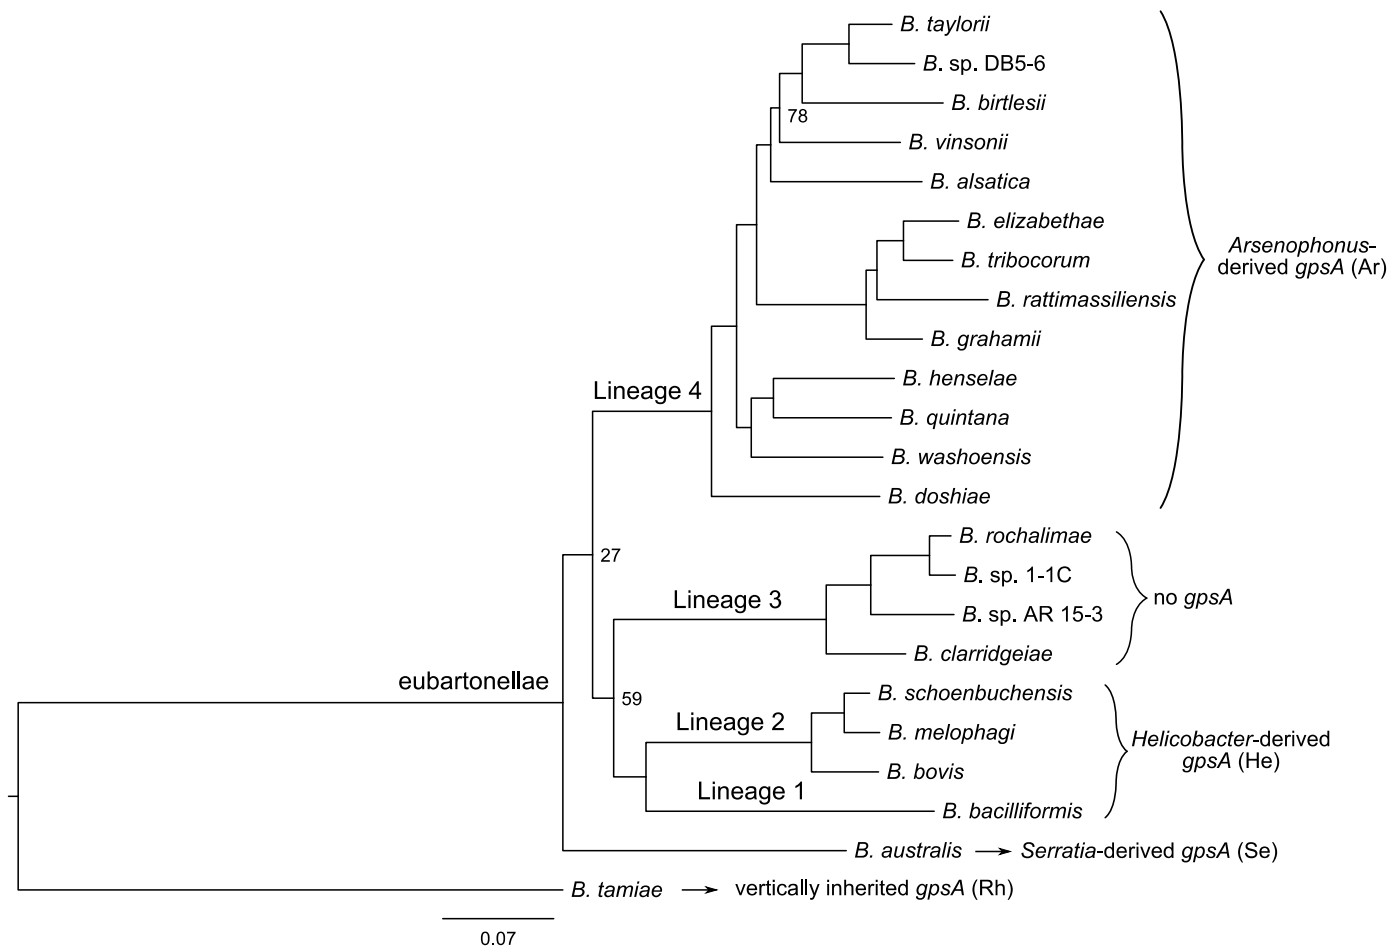

**Figure S1 Core genome phylogeny of *Bartonella***

The tree was reconstructed based on 516 single-copy genes shared by 23 *Bartonella* species using the maximum likelihood (ML) method as implemented in RAxML. Major *Bartonella* lineages according to Engel et al. (2011) are indicated. Node labels are bootstrap support values (out of 100 replicates). Nodes without labels are fully supported (bootstrap = 100).

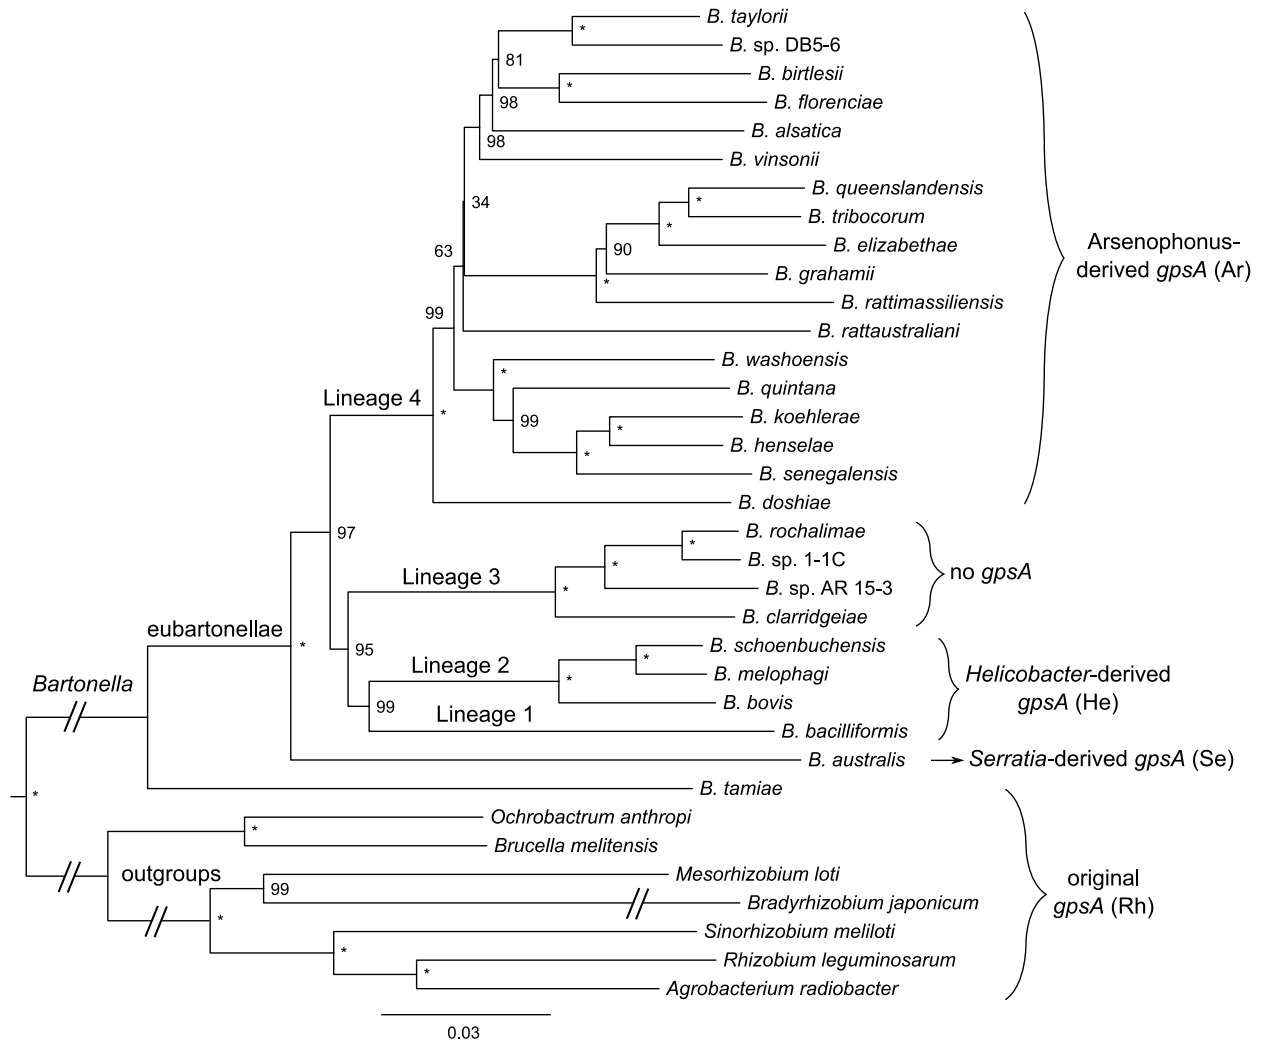

**Figure S2 Standard phylogenetic analysis of *Bartonella***

Tree topology based on commonly used genetic markers of 28 *Bartonella* species, rooted to Rhizobiales. *Bartonella* species are ingroup. Major *Bartonella* lineages according to Engel et al (2011) are indicated. Node labels are bootstrap support values (out of 100 replicates). Asterisks (\*) indicate 100% support.

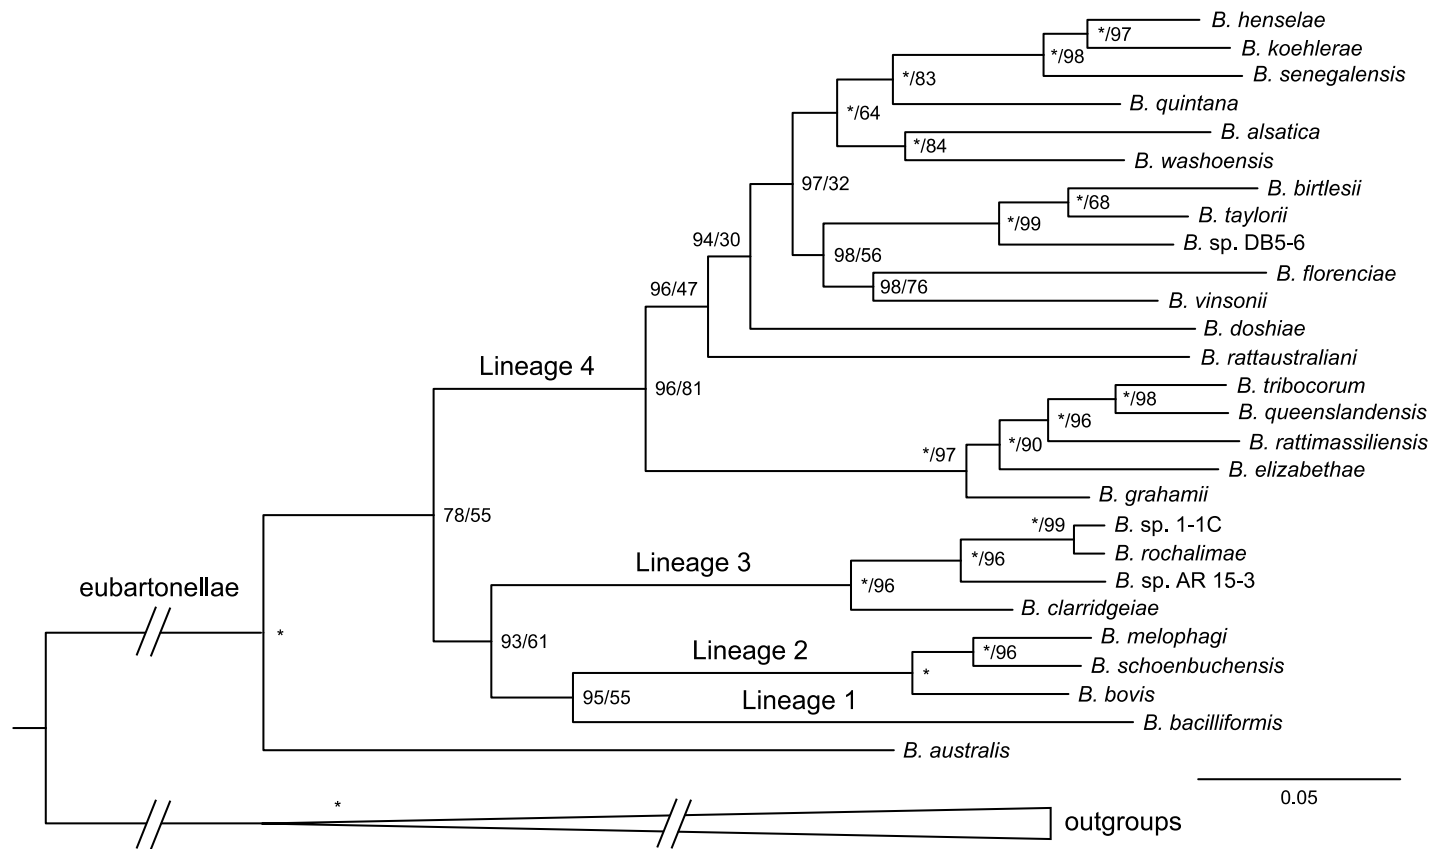

**Figure S3 Phylogeny of the Ugp system in *Bartonella***

Four genes that constitute the *ugp* operon: *ugpB*, *A*, *E* and *C*, were concatenated, a phylogenetic tree was inferred in MrBayes. Node labels are Bayesian posterior probabilities / maximum-likelihood bootstrap support values. Asterisks (\*) indicate 100% support. The tree is rooted to Rhizobiales outgroups (Table S1), which are collapsed into a triangle.

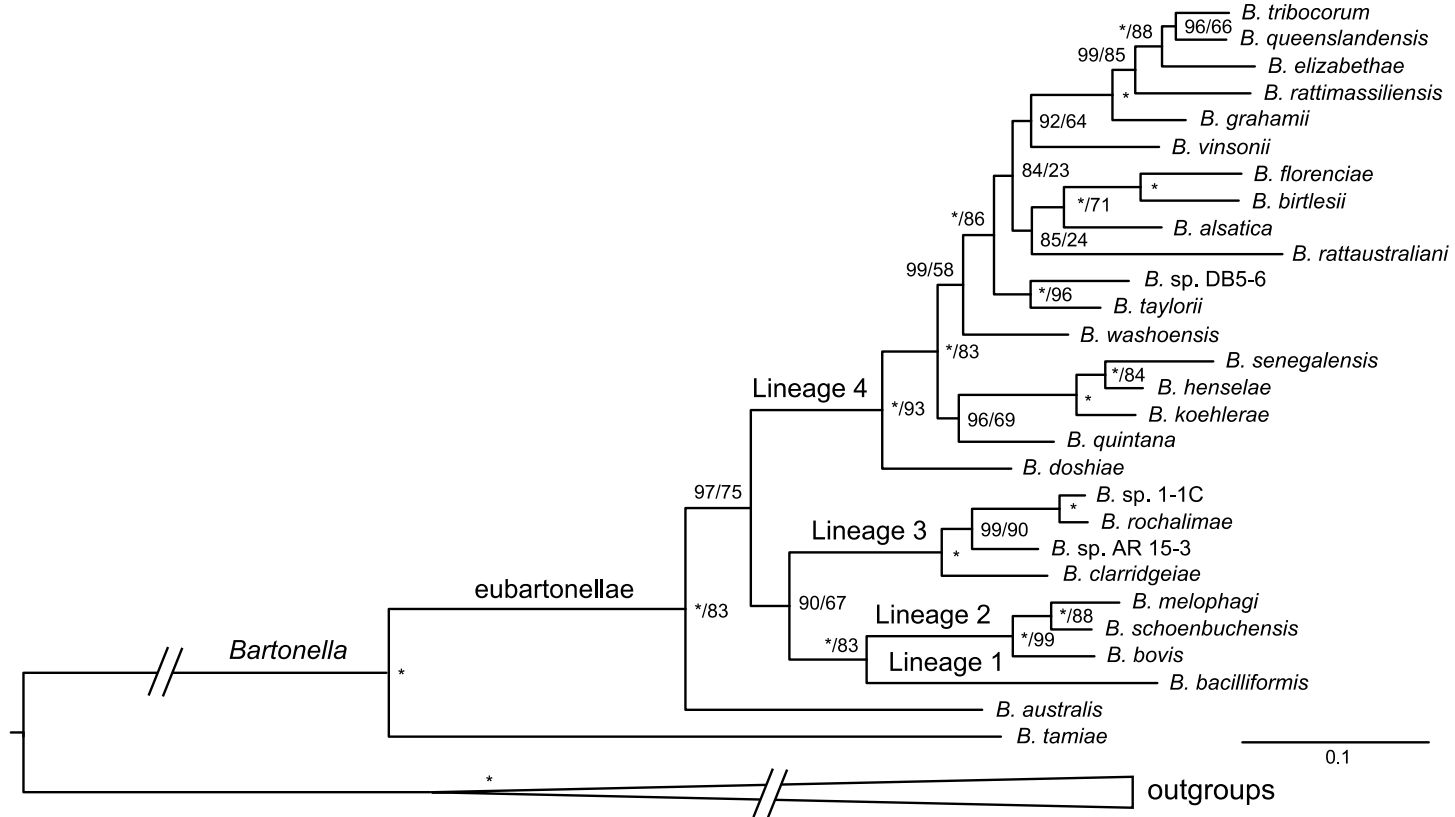

**Figure S4 Phylogeny of *Bartonella plsX* gene**

Node labels are Bayesian posterior probabilities / maximum-likelihood bootstrap support values. Asterisks (\*) indicate 100% support. The tree is rooted to Rhizobiales outgroups (Table S1), which are collapsed into a triangle.

**Table S1 Additional genomic data assessed in this study**

| Genus                                                            | Species                 | Strain                 | NCBI Assembly |
|------------------------------------------------------------------|-------------------------|------------------------|---------------|
| <b>Outgroups of <i>Bartonella</i></b> (Figure 2, S1-4)           |                         |                        |               |
| <i>Ochrobactrum</i>                                              | <i>O. anthropi</i>      | ATCC 49188             | GCF_000017405 |
| <i>Brucella</i>                                                  | <i>B. melitensis</i>    | bv. 1 str. 16M         | GCF_000007125 |
| <i>Mesorhizobium</i>                                             | <i>M. loti</i>          | MAFF303099             | GCF_000009625 |
| <i>Sinorhizobium</i>                                             | <i>S. meliloti</i>      | 1021                   | GCF_000006965 |
| <i>Rhizobium</i>                                                 | <i>R. leguminosarum</i> | bv. viciae 3841        | GCF_000009265 |
| <i>Agrobacterium</i>                                             | <i>A. radiobacter</i>   | K84                    | GCF_000016265 |
| <i>Bradyrhizobium</i>                                            | <i>B. japonicum</i>     | USDA 110               | GCF_000011365 |
| <b>Other Rhizobiales</b> (Figure 3A)                             |                         |                        |               |
| <i>Bartonella</i>                                                | <i>B. tamiae</i>        | Th307                  | GCF_000279995 |
| <i>Brucella</i>                                                  | <i>B. abortus</i>       | S19                    | GCF_000018725 |
|                                                                  | <i>B. microti</i>       | CCM 4915               | GCF_000022745 |
|                                                                  | <i>B. pinnipedialis</i> | B2/94                  | GCF_000221005 |
|                                                                  | <i>B. ovis</i>          | ATCC 25840             | GCF_000016845 |
|                                                                  | <i>B. canis</i>         | ATCC 23365             | GCF_000018525 |
|                                                                  | <i>B. suis</i>          | 1330                   | GCF_000007505 |
| <i>Ochrobactrum</i>                                              | <i>O. sp. CDB2</i>      | -                      | GCF_000344725 |
|                                                                  | <i>O. intermedium</i>   | M86                    | GCF_000332835 |
| <i>Mesorhizobium</i>                                             | <i>M. ciceri</i>        | bv. biserrulae WSM1271 | GCF_000185905 |
|                                                                  | <i>M. opportunistum</i> | WSM2075                | GCF_000176035 |
|                                                                  | <i>M. australicum</i>   | WSM2073                | GCF_000230995 |
| <i>Nitratireductor</i>                                           | <i>N. aquibiodomus</i>  | RA22                   | GCF_000265055 |
|                                                                  | <i>N. indicus</i>       | C115                   | GCF_000300515 |
|                                                                  | <i>N. pacificus</i>     | pht-3B                 | GCF_000300335 |
| <i>Rhizobium</i>                                                 | <i>R. etli</i>          | CFN 42                 | GCF_000092045 |
|                                                                  | <i>R. tropici</i>       | CIAT 899               | GCF_000330885 |
| <i>Agrobacterium</i>                                             | <i>A. fabrum</i>        | str. C58               | GCF_000092025 |
|                                                                  | <i>A. sp. H13-3</i>     | -                      | GCF_000192635 |
|                                                                  | <i>A. vitis</i>         | S4                     | GCF_000016285 |
| <i>Sinorhizobium</i>                                             | <i>S. medicae</i>       | WSM419                 | GCF_000017145 |
|                                                                  | <i>S. fredii</i>        | NGR234                 | GCF_000018545 |
| <i>Bradyrhizobium</i>                                            | <i>B. sp. ORS 278</i>   | -                      | GCF_000026145 |
| <i>Rhodopseudomonas</i>                                          | <i>R. palustris</i>     | CGA009                 | GCF_000195775 |
| <i>Xanthobacter</i>                                              | <i>X. autotrophicus</i> | Py2                    | GCF_000017645 |
| <i>Methylobacterium</i>                                          | <i>M. extorquens</i>    | PA1                    | GCF_000018845 |
| <b>Helicobacteraceae and other Campylobacterales</b> (Figure 3B) |                         |                        |               |
| <i>Helicobacter</i>                                              | <i>H. pylori</i>        | G27                    | GCF_000021165 |
|                                                                  | <i>H. pylori</i>        | 26695                  | GCF_000307795 |
|                                                                  | <i>H. pylori</i>        | B38                    | GCF_000091345 |
|                                                                  | <i>H. pylori</i>        | J99                    | GCF_000008785 |
|                                                                  | <i>H. acinonychis</i>   | str. Sheeba            | GCF_000009305 |
|                                                                  | <i>H. bizzozeronii</i>  | CIII-1                 | GCF_000237285 |
|                                                                  | <i>H. felis</i>         | ATCC 49179             | GCF_000200595 |
|                                                                  | <i>H. mustelae</i>      | 12198                  | GCF_000091985 |
|                                                                  | <i>H. cinaedi</i>       | CCUG 18818             | GCF_000155475 |
|                                                                  | <i>H. hepaticus</i>     | ATCC 51449             | GCF_000007905 |
|                                                                  | <i>H. canadensis</i>    | MIT 98-5491            | GCF_000162575 |
|                                                                  | <i>H. winghamensis</i>  | ATCC BAA-430           | GCF_000158455 |
|                                                                  | <i>Wolinella</i>        | <i>W. succinogenes</i> | DSM 1740      |
| <i>Campylobacter</i>                                             | <i>C. concisus</i>      | 13826                  | GCF_000017725 |
|                                                                  | <i>C. fetus</i>         | subsp. fetus 82-40     | GCF_000015085 |
| <i>Arcobacter</i>                                                | <i>A. butzleri</i>      | JV22                   | GCF_000185325 |

| Genus                                                              | Species                   | Strain                                                            | NCBI Assembly |               |
|--------------------------------------------------------------------|---------------------------|-------------------------------------------------------------------|---------------|---------------|
| <b>Enterobacteriales and other Gammaproteobacteria (Figure 3C)</b> |                           |                                                                   |               |               |
| <i>Arsenophonus</i>                                                | <i>A. nasoniae</i>        | DSM 15247                                                         | GCA_000429565 |               |
| <i>Providencia</i>                                                 | <i>P. alcalifaciens</i>   | DSM 30120                                                         | GCF_000173415 |               |
|                                                                    | <i>P. rettgeri</i>        | DSM 1131                                                          | GCF_000158055 |               |
|                                                                    | <i>P. rustigianii</i>     | DSM 4541                                                          | GCF_000156395 |               |
|                                                                    | <i>P. stuartii</i>        | ATCC 25827                                                        | GCF_000154865 |               |
|                                                                    | <i>P. asymbiotica</i>     | ATCC 43949                                                        | GCF_000196475 |               |
| <i>Photorhabdus</i>                                                | <i>P. luminescens</i>     | subsp. laumondii TTO1                                             | GCF_000196155 |               |
|                                                                    | <i>Xenorhabdus</i>        | <i>X. bovienii</i>                                                | SS-2004       | GCF_000027225 |
| <i>Proteus</i>                                                     | <i>X. nematophila</i>     | ATCC 19061                                                        | GCF_000252955 |               |
|                                                                    | <i>P. mirabilis</i>       | HI4320                                                            | GCF_000069965 |               |
|                                                                    | <i>P. penneri</i>         | ATCC 35198                                                        | GCF_000155835 |               |
| <i>Morganella</i>                                                  | <i>P. vulgaris</i>        | CCUG 19017                                                        | GU254061      |               |
|                                                                    | <i>M. morganii</i>        | subsp. morganii KT                                                | GCF_000286435 |               |
|                                                                    | <i>Serratia</i>           | <i>S. proteamaculans</i>                                          | 568           | GCF_000018085 |
|                                                                    |                           | <i>S. liquefaciens</i>                                            | ATCC 27592    | GCF_000422085 |
| <i>S. plymuthica</i>                                               |                           | AS9                                                               | GCF_000214235 |               |
| <i>Yersinia</i>                                                    | <i>S. symbiotica</i>      | str. 'Cinara cedri'                                               | GCF_000238975 |               |
|                                                                    | <i>S. marcescens</i>      | WW4                                                               | GCF_000336425 |               |
|                                                                    | <i>Y. enterocolitica</i>  | subsp. palearctica 105.5R(r)                                      | GCF_000192105 |               |
|                                                                    | <i>Y. kristensenii</i>    | ATCC 33638                                                        | GCF_000173715 |               |
|                                                                    | <i>Y. pestis</i>          | A1122                                                             | GCF_000222975 |               |
| <i>Candidatus Hamiltonella</i>                                     | <i>Y. rohdei</i>          | ATCC 43380                                                        | GCF_000173775 |               |
|                                                                    | <i>H. defensa</i>         | 5AT                                                               | GCF_000021705 |               |
|                                                                    | <i>Dickeya</i>            | <i>D. dadantii</i>                                                | Ech703        | GCF_000023545 |
| <i>D. zeae</i>                                                     |                           | Ech1591                                                           | GCF_000023565 |               |
| <i>Pectobacterium</i>                                              | <i>P. atrosepticum</i>    | SCRI1043                                                          | GCF_000011605 |               |
| <i>Candidatus Blochmannia</i>                                      | <i>B. floridanus</i>      | -                                                                 | GCF_000043285 |               |
|                                                                    | <i>B. pennsylvanicus</i>  | str. BPEN                                                         | GCF_000011745 |               |
|                                                                    | <i>B. vafer</i>           | str. BVAF                                                         | GCF_000185985 |               |
| <i>Wigglesworthia</i>                                              | <i>W. glossinidia</i>     | endosymbiont of <i>Glossina morsitans morsitans</i> (Yale colony) | GCF_000247565 |               |
| <i>Baumannia</i>                                                   | <i>B. cicadellinicola</i> | str. Hc ( <i>Homalodisca coagulata</i> )                          | GCF_000013185 |               |
| <i>Sodalis</i>                                                     | <i>S. glossinidius</i>    | str. 'morsitans'                                                  | GCF_000010085 |               |
| <i>Escherichia</i>                                                 | <i>E. albertii</i>        | albertii TW07627                                                  | GCF_000155105 |               |
|                                                                    | <i>E. coli</i>            | 2534-86                                                           | GCF_000225065 |               |
|                                                                    | <i>E. fergusonii</i>      | ATCC 35469                                                        | GCF_000026225 |               |
|                                                                    | <i>Shigella</i>           | <i>S. boydii</i>                                                  | Sb227         | GCF_000012025 |
|                                                                    |                           | <i>S. dysenteriae</i>                                             | Sd197         | GCF_000012005 |
| <i>S. flexneri</i>                                                 |                           | K-315                                                             | GCF_000268165 |               |
| <i>Citrobacter</i>                                                 | <i>S. sonnei</i>          | Ss046                                                             | GCF_000092525 |               |
|                                                                    | <i>C. koseri</i>          | ATCC BAA-895                                                      | GCF_000018045 |               |
|                                                                    | <i>C. rodentium</i>       | ICC168                                                            | GCF_000027085 |               |
| <i>Salmonella</i>                                                  | <i>S. bongori</i>         | NCTC 12419                                                        | GCF_000252995 |               |
|                                                                    | <i>S. enterica</i>        | subsp. enterica serovar Typhi str. P-stx-12                       | GCF_000245535 |               |
| <i>Enterobacter</i>                                                | <i>E. cloacae</i>         | subsp. dissolvens SDM                                             | GCF_000235765 |               |
|                                                                    | <i>E. radicincitans</i>   | DSM 16656                                                         | GCF_000280495 |               |
|                                                                    | <i>E. sp. 638</i>         | -                                                                 | GCF_000016325 |               |
| <i>Yokenella</i>                                                   | <i>Y. regensburgei</i>    | ATCC 43003                                                        | GCF_000239335 |               |
| <i>Klebsiella</i>                                                  | <i>K. oxytoca</i>         | E718                                                              | GCF_000276705 |               |
|                                                                    | <i>K. pneumonia</i>       | KCTC 2242                                                         | GCF_000220485 |               |
|                                                                    | <i>K. variicola</i>       | At-22                                                             | GCF_000025465 |               |
| <i>Cronobacter</i>                                                 | <i>C. sakazakii</i>       | ES15                                                              | GCF_000263215 |               |
|                                                                    | <i>C. turicensis</i>      | z3032                                                             | GCF_000027065 |               |
| <i>Erwinia</i>                                                     | <i>E. amylovora</i>       | ATCC 49946                                                        | GCF_000027205 |               |

| Genus                 | Species                    | Strain                     | NCBI Assembly |
|-----------------------|----------------------------|----------------------------|---------------|
|                       | <i>E. billingiae</i>       | Eb661                      | GCF_000196615 |
|                       | <i>E. pyrifoliae</i>       | DSM 12163                  | GCF_000026985 |
|                       | <i>E. tasmaniensis</i>     | ET1/99                     | GCF_000026185 |
| <i>Pantoea</i>        | <i>P. ananatis</i>         | AJ13355                    | GCF_000270125 |
|                       | <i>P. sp. GM01</i>         | -                          | GCF_000282675 |
|                       | <i>P. sp. YR343</i>        | -                          | GCF_000282695 |
|                       | <i>P. vagans</i>           | C9-1                       | GCF_000148935 |
| <i>Actinobacillus</i> | <i>A. pleuropneumoniae</i> | serovar 3 str. JL03        | GCF_000016685 |
| <i>Haemophilus</i>    | <i>H. sputorum</i>         | CCUG 13788                 | GCF_000238795 |
| <i>Pasteurella</i>    | <i>P. dagmatis</i>         | ATCC 43325                 | GCF_000163475 |
|                       | <i>P. multocida</i>        | subsp. multocida str. Pm70 | GCF_000006825 |
| <i>Vibrio</i>         | <i>V. cholera</i>          | O395                       | GCF_000021625 |
|                       | <i>V. cyclitrophicus</i>   | ZF14 subcontig_64          | GCF_000256265 |
|                       | <i>V. fischeri</i>         | SR5                        | GCF_000241785 |
|                       | <i>V. parahaemolyticus</i> | K5030                      | GCF_000182465 |



**Table S2 Selection test results**

| Gene              | Tree      | M0       | Site models       |                  | Foreground branch                             | Branch model |            |                               | Branch site models |                                                                                                                                                                                                     |
|-------------------|-----------|----------|-------------------|------------------|-----------------------------------------------|--------------|------------|-------------------------------|--------------------|-----------------------------------------------------------------------------------------------------------------------------------------------------------------------------------------------------|
|                   |           | $\omega$ | LRT (M2a vs. M1a) | LRT (M8a vs. M8) |                                               | $\omega_0$   | $\omega_1$ | LRT (one-ratio vs. two-ratio) | LRT (A1 vs. A)     | Positive sites (BEB)                                                                                                                                                                                |
| <i>gpsA</i> (Rh)  | Figure 3A | 0.0909   | 0.00              | 0.00             | <i>B. tami</i> ae clade                       | 0.0939       | 0.0035     | 16.90***                      | 5.05*              | 26C, 80Y, 83L, 146E, 150K, 258N*, 271A, 284R, 302K, 314R*, 328S                                                                                                                                     |
|                   |           |          |                   |                  | <i>Agrobacterium</i> + <i>Rhizobium</i> clade | 0.0867       | 0.0991     | 1.45                          | -                  |                                                                                                                                                                                                     |
|                   |           |          |                   |                  | <i>Brucella</i> clade                         | 0.0913       | 0.0810     | 0.14                          | -                  |                                                                                                                                                                                                     |
|                   |           |          |                   |                  | <i>Ochrobactrum</i> + <i>Brucella</i> clade   | 0.0919       | 0.0865     | 0.22                          | -                  |                                                                                                                                                                                                     |
|                   |           |          |                   |                  | <i>Mesorhizobium</i> clade                    | 0.0917       | 0.0856     | 0.23                          | -                  |                                                                                                                                                                                                     |
|                   |           |          |                   |                  | <i>Nitratireductor</i> clade                  | 0.0974       | 0.0525     | 13.81***                      | -                  |                                                                                                                                                                                                     |
|                   |           |          |                   |                  | <i>Sinorhizobium</i> clade                    | 0.0911       | 0.0891     | 0.02                          | -                  |                                                                                                                                                                                                     |
| <i>gpsA</i> (He)  | Figure 3B | 0.0730   | 0.00              | 0.00             | <i>Bartonella</i> (L1+L2) node                | 0.0754       | 0.0012     | 8.37***                       | 3.19               | 62S, 102K*, 230Q                                                                                                                                                                                    |
|                   |           |          |                   |                  | <i>Bartonella</i> (L1+L2) clade               | 0.0298       | 0.1563     | 52.9***                       | 0.00               | 102K, 118T, 124H, 230Q                                                                                                                                                                              |
| <i>gpsA</i> (En)  | Figure 3C | 0.0887   | 0.00              | 0.00             | <i>Bartonella</i> (L4) node                   | 0.0886       | 0.0889     | 0.00                          | 0.88               | 102N*, 150I, 319G, 333T*                                                                                                                                                                            |
|                   |           |          |                   |                  | <i>Bartonella</i> (L4) clade                  | 0.0694       | 0.1742     | 240.00***                     | 0.00               | 24A**, 37Y**, 38N**, 49H**, 54A**, 60Q*, 77A*, 79R**, 91H**, 95N*, 97Q**, 102N**, 104H**, 116H**, 121L*, 166S*, 176D*, 239L**, 267I**, 275I**, 282I*, 296R**, 297M**, 314H**, 319G**, 331S*, 333T** |
|                   |           |          |                   |                  | <i>Arsenophonus</i> node                      | 0.0889       | 0.0369     | 0.83                          | -                  |                                                                                                                                                                                                     |
|                   |           |          |                   |                  | <i>Arsenophonus</i> clade                     | 0.0883       | 0.1194     | 1.42                          | -                  |                                                                                                                                                                                                     |
|                   |           |          |                   |                  | <i>Arsenophonus-Bartonella</i> (L4) node      | 0.0893       | 0.0498     | 5.03*                         | -                  |                                                                                                                                                                                                     |
|                   |           |          |                   |                  | <i>B. australis</i> tip                       | 0.0877       | 0.2050     | 10.49**                       | 0.00               | 40S, 107V, 108L, 123W*, 218V*, 284R, 301H, 303D                                                                                                                                                     |
| <i>ugpB-A-E-C</i> | Figure S3 | 0.0844   | -                 | -                | <i>B. australis</i> tip                       | 0.0846       | 0.0825     | 0.04                          | -                  |                                                                                                                                                                                                     |
|                   |           |          |                   |                  | <i>Bartonella</i> (L1) tip                    | 0.0837       | 0.0986     | 1.55                          | -                  |                                                                                                                                                                                                     |
|                   |           |          |                   |                  | <i>Bartonella</i> (L2) clade                  | 0.0816       | 0.1160     | 12.64***                      | -                  |                                                                                                                                                                                                     |
|                   |           |          |                   |                  | <i>Bartonella</i> (L3) clade                  | 0.0856       | 0.0756     | 1.86                          | -                  |                                                                                                                                                                                                     |
|                   |           |          |                   |                  | <i>Bartonella</i> (L4) clade                  | 0.0921       | 0.0806     | 4.94*                         | -                  |                                                                                                                                                                                                     |
| <i>plsX</i>       | Figure S4 | 0.0826   | 0.00              | 2.50             | <i>Bartonella</i> (L3) clade                  | 0.0794       | 0.1100     | 3.83                          | -                  |                                                                                                                                                                                                     |

The table reports  $\omega$  (dN/dS value), LRT (likelihood ratio test value, =  $2(\ln L_1 - \ln L_0)$ ) and its significance level (indicated by \*), as well as putative positively selected sites with significance level (indicated by \*) estimated by the BEB method. Branches of interest were labeled as foreground branches in the analyses. "Node" refers to a single branch. "Clade" refers to the selected branch and all sub-branches after it.  $\omega$  under the one-ratio model (M0) is the global  $\omega$  for the whole tree.  $\omega_1$  and  $\omega_0$  under the branch model refer to the  $\omega$  values for the foreground branch and the tree background, respectively. Coordinates and residues of putative positively selected sites refer to the protein sequence alignment in Figure 4.
